# Supplementary material
Source: ML conference proceedings conference paper supplement (https://aclanthology.org/2020.findings-emnlp.77)
Supplement: OptionalSupplementaryMaterial [file 2020.findings-emnlp.77.OptionalSupplementaryMaterial.zip]

# Supplemental Materials: Sequential Span Classification with Neural Semi-Markov CRFs for Biomedical Abstracts

Kosuke Yamada<sup>1</sup> Tsutomu Hirao<sup>2</sup> Ryohei Sasano<sup>1</sup>

Koichi Takeda<sup>1</sup> Masaaki Nagata<sup>2</sup>

<sup>1</sup>Graduate School of Informatics, Nagoya University, Japan

<sup>2</sup>NTT Communication Science Laboratories, NTT Corporation, Japan

yamada.kosuke@c.mbox.nagoya-u.ac.jp,

{tsutomu.hirao.kp, masaaki.nagata.et}@hco.ntt.co.jp,

{sasano, takedasu}@i.nagoya-u.ac.jp

## A Number of Parameters

Table 5 shows the number of parameters that are optimized in the training phase. The methods of Jin and Szolovits and Cohan et al. use word vectors as input, while the proposed method and BiLSTMs+CRFs use sentence vectors as input. This is the reason why the number of parameters in the proposed method and BiLSTMs+CRFs is much smaller than that in the other two methods. If we regard the parameters of BERT as a part of the parameters of our proposed methods and BiLSTM+CRFs, the number of parameters in the proposed method, BiLSTMs+CRFs, and Cohan et al. is almost the same.

|                   | # of parameters |
|-------------------|-----------------|
| Proposed          | 328,872         |
| BiLSTMs+CRFs      | 329,069         |
| Jin and Szolovits | 10,663,048      |
| Cohan et al.      | 110,058,391     |

Table 5: Number of parameters in each method.

## B Training Time and Epochs

Table 6 shows the training time and the number of epochs for PubMed 20k RCT. Table 7 shows the average of training time and the average number of epochs in 10-fold cross-validation for NICTA-PIBOSO. We trained all models on a single Nvidia GeForce GTX 1080 Ti GPU.

## C Validation Performance

Tables 8 and 9 show the validation performance on PubMed 20k RCT and NICTA-PIBOSO development datasets, respectively.

|                   | training time      | epochs |
|-------------------|--------------------|--------|
| Proposed          | $3.24 \times 10^5$ | 60     |
| BiLSTMs+CRFs      | $5.40 \times 10^3$ | 30     |
| Jin and Szolovits | $1.35 \times 10^5$ | 90     |
| Cohan et al.      | $1.84 \times 10^5$ | 2      |

Table 6: Training time (seconds) and the number of epochs in the PubMed 20k RCT development dataset.

|                   | training time      | epochs |
|-------------------|--------------------|--------|
| Proposed          | $4.15 \times 10^4$ | 98.7   |
| BiLSTMs+CRFs      | $1.94 \times 10^2$ | 19.4   |
| Jin and Szolovits | $2.14 \times 10^3$ | 11.9   |
| Cohan et al.      | $4.92 \times 10^2$ | 4.1    |

Table 7: Training time (seconds) and the number of epochs in the NICTA-PIBOSO development dataset.

|                   | sentence-F <sub>1</sub> | span-F <sub>1</sub> |
|-------------------|-------------------------|---------------------|
| Proposed          | 93.2                    | 83.5                |
| BiLSTMs+CRFs      | 92.3                    | 82.0                |
| Jin and Szolovits | 93.2                    | 83.6                |
| Cohan et al.      | 93.1                    | 82.9                |

Table 8: Validation performance on the PubMed 20k RCT development dataset.

|                   | sentence-F <sub>1</sub> | span-F <sub>1</sub> |
|-------------------|-------------------------|---------------------|
| Proposed          | 85.7                    | 62.1                |
| BiLSTMs+CRFs      | 85.8                    | 62.5                |
| Jin and Szolovits | 82.4                    | 53.3                |
| Cohan et al.      | 84.3                    | 57.2                |

Table 9: Validation performance on the NICTA-PIBOSO development dataset.
